# Supplementary material for: Intracellular diversity of WNV within circulating avian peripheral blood mononuclear cells reveals host-dependent patterns of polyinfection
Source: PubMed Central journal article supplement — bioRxiv. 2023 Jan 29:2023.01.27.525959. Preprint. [Version 1] doi: 10.1101/2023.01.27.525959 (PMC9900929; doi:10.1101/2023.01.27.525959), 2023-01-29

**S1 Figure. WNV replicates in DF1 Cells and *ex vivo* crow and robin PBMCs.** Titers determined by plaque assay of DF1 cells (**A**), crow PBMCs (**B**) and robin PBMCs (**C**) infected with field strain WNV at MOI of 0.1, 1 and 10 (n=2 wells per cell type per MOI). Genome copies determined by qRT-PCR of DF1 cells (**D**), crow PBMCs (**E**) and robin PBMCs (**F**) (n=2 wells per cell type per MOI). WNV genome equivalents to plaque forming units (GE:PFU) at MOI of 0.1 (**G**) (\*, DF1 vs crow PBMC,  $P = 0.0215$ ; \*, robin vs crow PBMC,  $P = 0.0185$ ; 2-way ANOVA, Tukey's Multiple Comparison), 1 (**H**) (\*\*\*\*, DF1 vs crow PBMC,  $P < 0.0001$ ; \*\*\*\*, robin vs crow PBMC,  $P < 0.0001$ ; 2-way ANOVA, Tukey's Multiple Comparison) and 10 (**I**) (\*\*\*\*, DF1 vs crow PBMC,  $P < 0.0001$ ; \*\*\*\*, robin vs crow PBMC,  $P < 0.0001$ ; 2-way ANOVA, Tukey's Multiple Comparison) of DF1 cells, robin PBMCs and crow PBMCs.

**S2 Figure.** T-Distributed Stochastic Neighbor Embedding (t-SNE) analysis to plot the data in two-dimensional space.

# S1 Figure

**A**

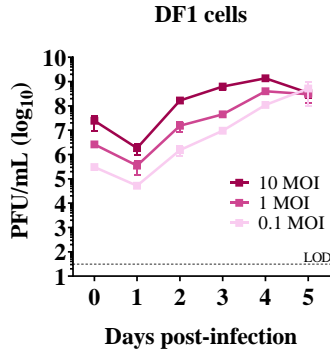

**B**

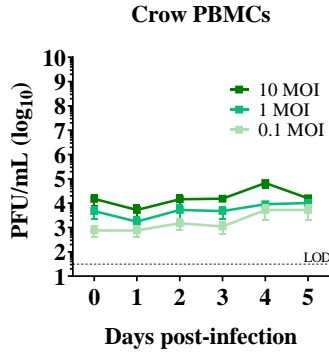

**C**

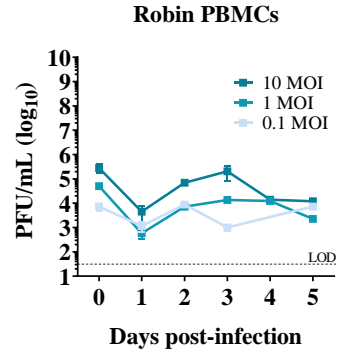

**D**

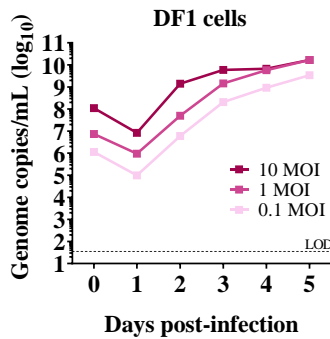

**E**

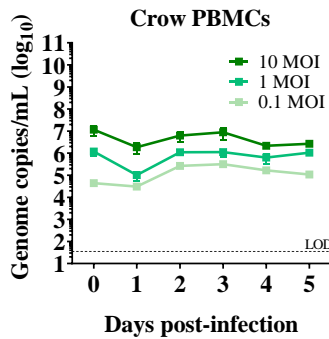

**F**

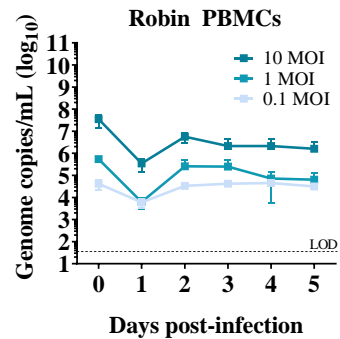

**G**

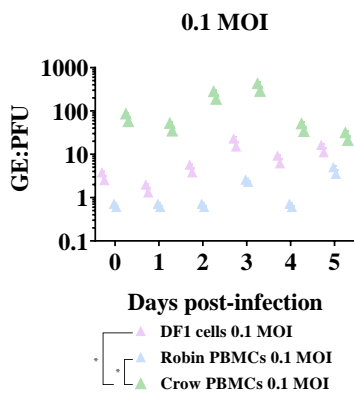

**H**

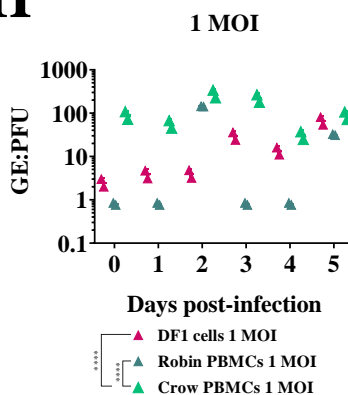

**I**

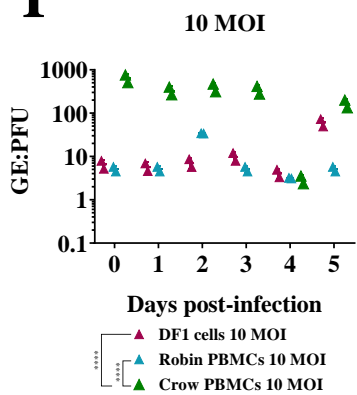

S2 Figure

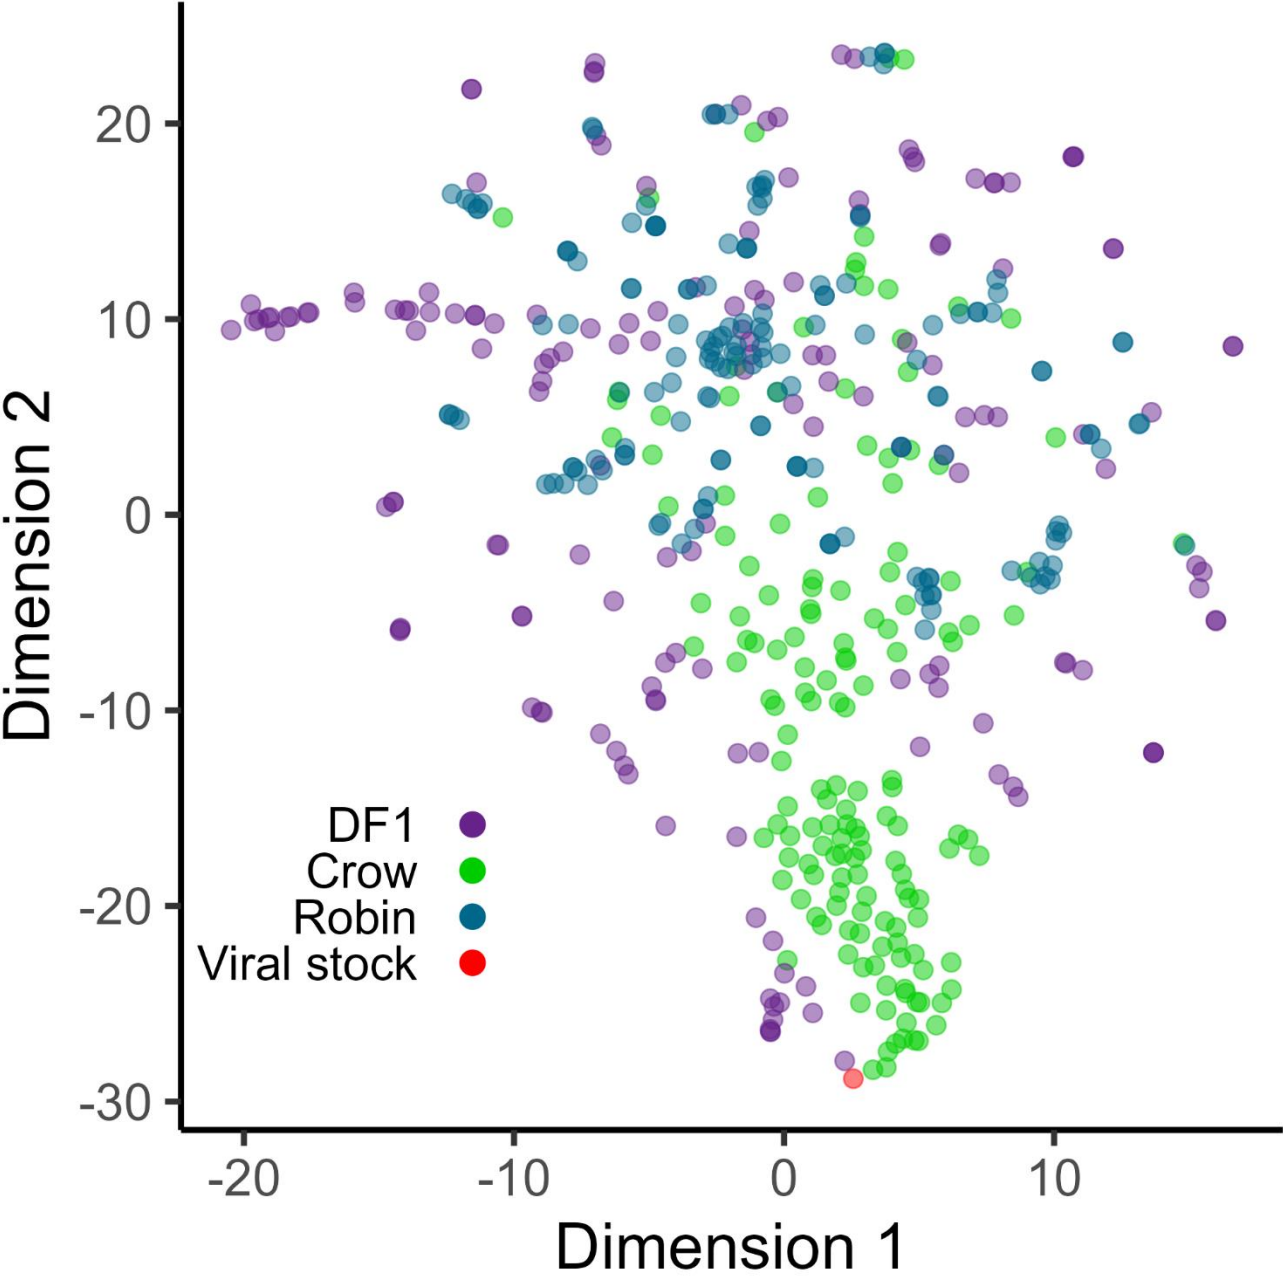

Supplement: NIHPP2023.01.27.525959v1-supplement-3.pdf [file NIHPP2023.01.27.525959v1-supplement-3.pdf]
